# Supplementary material
Source: PubMed Central journal article supplement (PMC3104404)
Supplement: NIHMS294970-supplement-Supplementary_Materials.pdf [file NIHMS294970-supplement-Supplementary_Materials.pdf]

## Supplemental Information

### Membrane and synaptic equations

Voltage and current equations for E neurons (I neurons are modeled similarly with parameters as below),

$$\frac{dV_i}{dt} = \frac{1}{C_E} * (-I_{NMDA,i} - I_{GABA,i} - I_{leak,i})$$

$$I_{leak,i} = g_{leak} * (V_i - E_{leak})$$

$$I_{NMDA,i} = g_{NMDA} * M_{NMDA,i} * \sum_{j=1}^{N_E} w_{E \rightarrow E}(i, j) * s_{NMDA,j} * (V_i - E_{NMDA})$$

$$\frac{ds_{NMDA,j}}{dt} = -\frac{1}{\tau_{NMDA}} * s_{NMDA,j} + 0.5 * x_j * (1 - s_{NMDA,j})$$

$$\frac{dx_j}{dt} = -\frac{1}{\tau_x} * x_j + \sum_{m \in \{spikes\}} \delta(t - t_m^{E,j})$$

where  $t_m^{E,j}$  are the spikes of E neuron j

$$M_{NMDA,i} = \frac{1}{(1 + \exp(-0.062 * V_i)) / 3.57}$$

$$I_{GABA,i} = g_{GABA} * \sum_{j=1}^{N_I} w_{I \rightarrow E}(i, j) s_{GABA,j} * (V_i - E_{GABA})$$

$$\frac{ds_{GABA,j}}{dt} = -\frac{1}{\tau_{GABA}} * s_{GABA,j} + \sum_{m \in \{spikes\}} \delta(t - t_m^{I,j})$$

where  $t_m^{I,j}$  are the spikes of I neuron j

## Synaptic weight functions

Synaptic weight equations for E→E, E→I, and I→E voltage equations. I→I synaptic weights are uniform with weight of 1/N<sub>I</sub> for all I neurons.

1.

$$\omega_{E \rightarrow E}(i, j) = \exp\left(\frac{-(i - j_{short})^2}{2\sigma_{E \rightarrow E}^2}\right) + \exp\left(\frac{-(i - j_{long})^2}{2\sigma_{E \rightarrow E}^2}\right)$$

$$\omega_{E \rightarrow I}(i, j) = 2.275 + \exp\left(\frac{-(i - j_{short})^2}{2\sigma_{E \rightarrow I}^2}\right) + \exp\left(\frac{-(i - j_{long})^2}{2\sigma_{E \rightarrow I}^2}\right)$$

$$\omega_{I \rightarrow E}(i, j) = .425 + \exp\left(\frac{-(i - j_{short})^2}{2\sigma_{I \rightarrow E}^2}\right) + \exp\left(\frac{-(i - j_{long})^2}{2\sigma_{I \rightarrow E}^2}\right)$$

2.

$$w_{E \rightarrow E}(i, j) = \frac{\omega_{E \rightarrow E}(i, j)}{\sum \omega_{E \rightarrow E}(i, j)}$$

$$w_{E \rightarrow I}(i, j) = \frac{\omega_{E \rightarrow I}(i, j)}{\sum \omega_{E \rightarrow I}(i, j)}$$

$$w_{I \rightarrow E}(i, j) = \frac{x_{I \rightarrow E}(i, j)}{\sum x_{I \rightarrow E}(i, j)}$$

Since neurons are arranged in a ring structure,  $j_{short}$  and  $j_{long}$  are the short and long distances between neurons on the synaptic distance map (**Figure 1A**).

The neuron spatial map is derived by the clustering relationship,

$$d_{near} = \frac{180}{N_{clusters} * (N_{cluster,E} - 1) * (1 + k)}$$

$$d_{far} = k * d_{near} * (N_{cluster,E} - 1)$$

where  $N_{clusters} = 100$  (the number of clusters) in the system,  $N_{cluster,E} = 8$  (the number of E neurons per cluster), and  $k$  is the clustering parameter which is equal to the ratio between  $d_{far}$  and  $d_{near} * (N_{cluster,E} - 1)$ .  $d_{far}$  refers to the maximum nearest-neighbor distance as depicted in Figure 1C, and  $d_{near}$  refers to the minimum nearest-neighbor distance.

**Table S1.** Model Parameters

| <b>Model Parameters</b>                                          |                |
|------------------------------------------------------------------|----------------|
| NMDA rise time constant ( $\tau_x$ )                             | 2 msec         |
| NMDA decay time constant ( $\tau_{NMDA}$ )                       | 100 msec       |
| GABA decay time constant ( $\tau_{GABA}$ )                       | 10 msec        |
| E and I neuron threshold potential                               | -50 mV         |
| E and I neuron resting potential                                 | -60 mV         |
| NMDA equilibrium potential ( $E_{NMDA}$ )                        | 0 mV           |
| GABA equilibrium potential ( $E_{GABA}$ )                        | -70 mV         |
| E and I neuron leakage equilibrium potential ( $E_{leak}$ )      | -70 mV         |
| E membrane capacitance ( $C_E$ )                                 | 0.5 nF         |
| I membrane capacitance ( $C_I$ )                                 | 0.2 nF         |
| maximum orientation value (degrees)                              | 180            |
| minimum orientation value (degrees)                              | 0              |
| NMDA maximum conductance to both E and I neurons ( $g_{NMDA}$ )  | 180 nS         |
| GABA maximum conductance to both E and I neurons ( $g_{GABA}$ )  | 1.6 nS         |
| Leak maximum conductance to E neurons ( $g_{leak,E}$ )           | 25 nS          |
| Leak maximum conductance to I neurons ( $g_{leak,I}$ )           | 20 nS          |
| $\sigma_{E \rightarrow E}$<br>(for the synaptic weight function) | 8              |
| $\sigma_{E \rightarrow I}$                                       | 32.4           |
| $\sigma_{I \rightarrow I}$                                       | not applicable |
| $\sigma_{I \rightarrow E}$                                       | 32.4           |
